# Supplementary material for: Are Isomeric Alkenes Used in Species Recognition among Neo-Tropical Stingless Bees (Melipona Spp)
Source: PubMed Central journal article supplement (PMC5735199; doi:10.1007/s10886-017-0901-5), 2017-11-17
Supplement: 10886_2017_901_MOESM1_ESM.pdf [file 10886_2017_901_MOESM1_ESM.pdf]

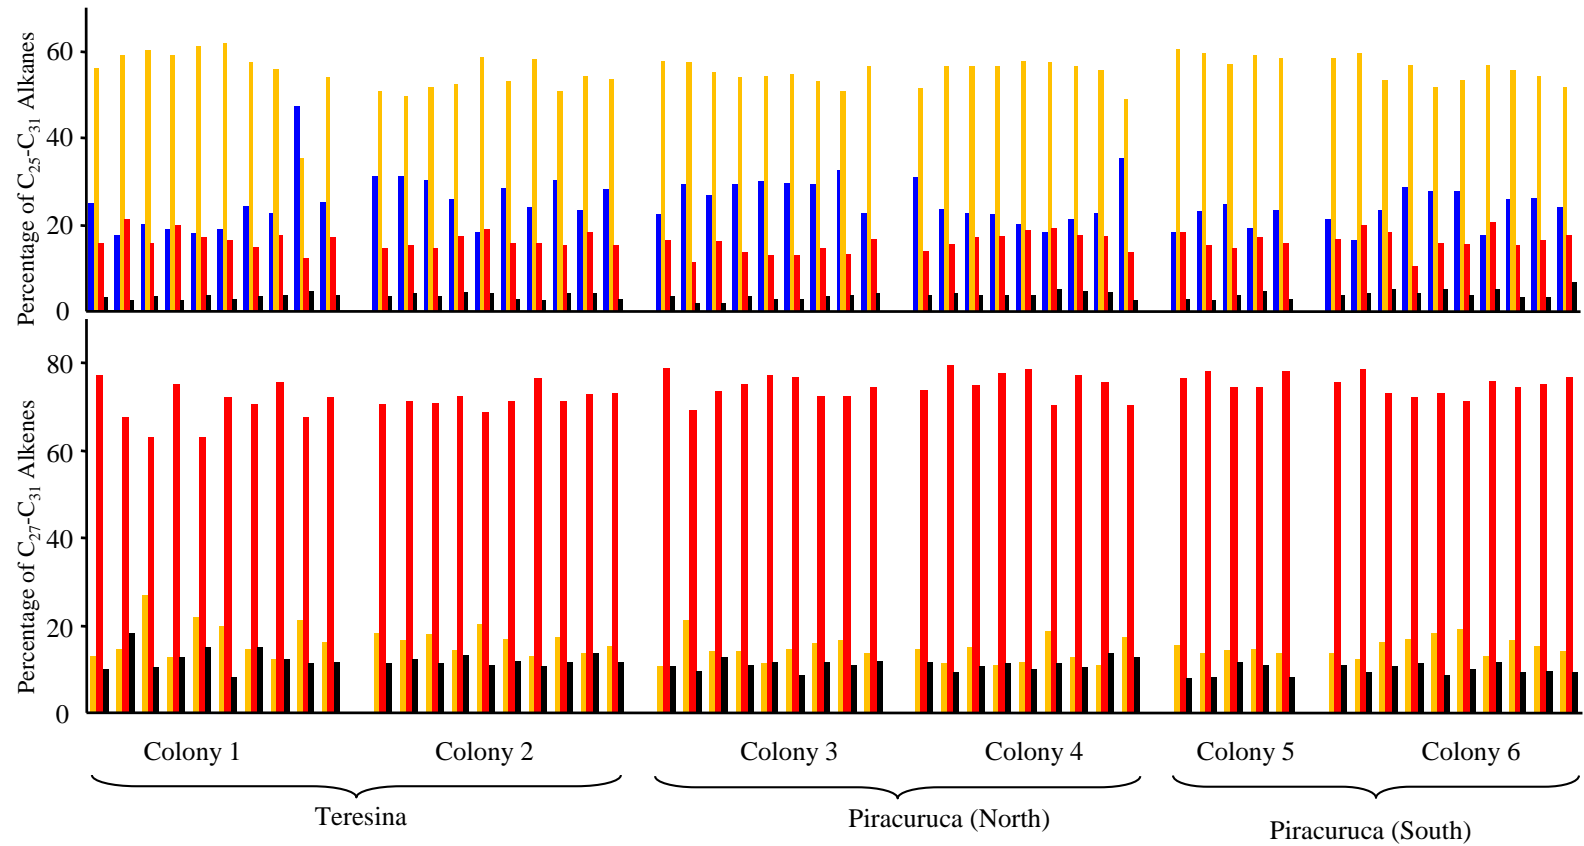

S1. Proportion of alkanes (upper) and alkenes (lower) of 53 individual *Melipona fasciculata* from six colonies located in 3 meliponaires. Each carbon chain length has a different colour with C<sub>25</sub> =blue, C<sub>27</sub> = yellow, C<sub>29</sub> = red and C<sub>31</sub> = black.
