# Supplementary material for: Are Isomeric Alkenes Used in Species Recognition among Neo-Tropical Stingless Bees (Melipona Spp)
Source: PubMed Central journal article supplement (PMC5735199; doi:10.1007/s10886-017-0901-5), 2017-11-17
Supplement: 10886_2017_901_MOESM3_ESM.pdf [file 10886_2017_901_MOESM3_ESM.pdf]

*Melipona scutellaris*

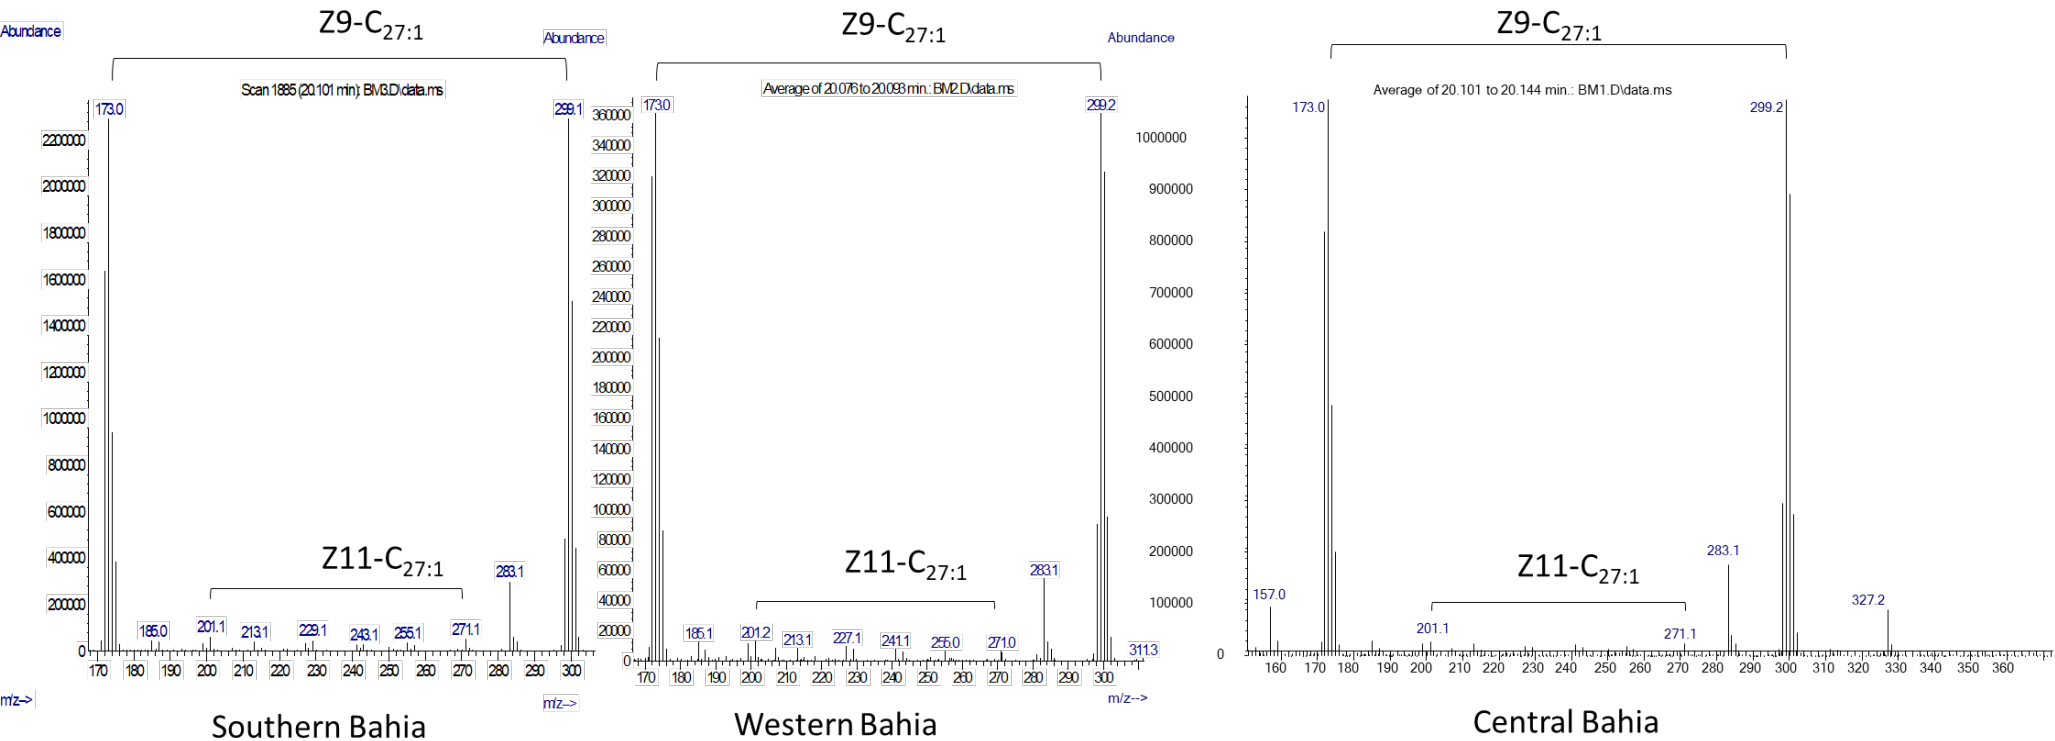

Fig. S3. The fragmentation patterns after a DMDS reaction showing the paired ions associated with the Z11 & Z9 alkene isomers in *M. scutellaris* from three different locations across the Brazilian state of Bahia.
