# Supplementary material for: Are Isomeric Alkenes Used in Species Recognition among Neo-Tropical Stingless Bees (Melipona Spp)
Source: PubMed Central journal article supplement (PMC5735199; doi:10.1007/s10886-017-0901-5), 2017-11-17
Supplement: 10886_2017_901_MOESM4_ESM.pdf [file 10886_2017_901_MOESM4_ESM.pdf]

*M. quadrifasciata*

Z9-C<sub>29:1</sub>

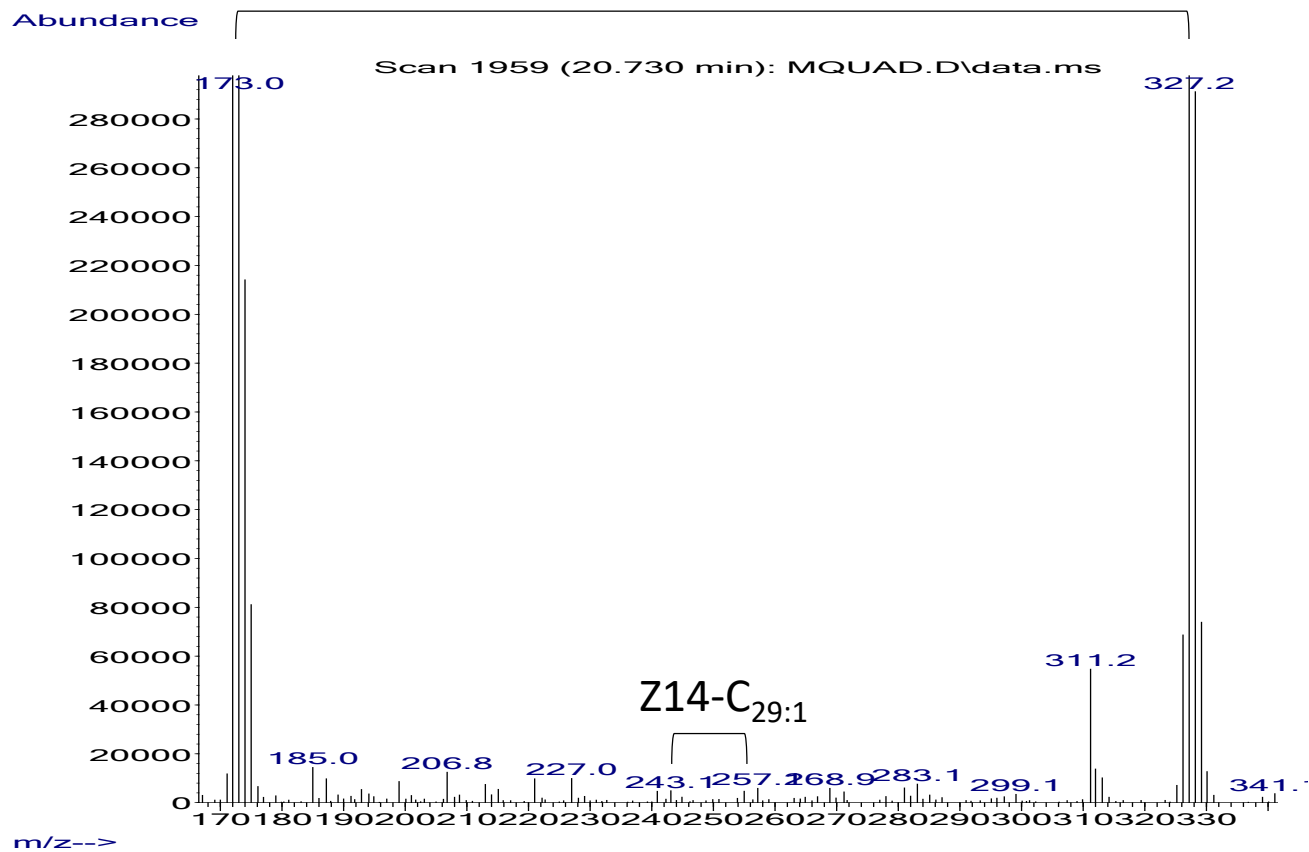

Fig. S4. The fragmentation patterns after a DMDS reaction showing the paired ions associated with the two alkene isomers detected in *M. quadrifasciata* collected from eastern Bahai in Brazil.
