# Supplementary material for: Are Isomeric Alkenes Used in Species Recognition among Neo-Tropical Stingless Bees (Melipona Spp)
Source: PubMed Central journal article supplement (PMC5735199; doi:10.1007/s10886-017-0901-5), 2017-11-17
Supplement: 10886_2017_901_MOESM7_ESM.pdf [file 10886_2017_901_MOESM7_ESM.pdf]

*M. fasciculata*

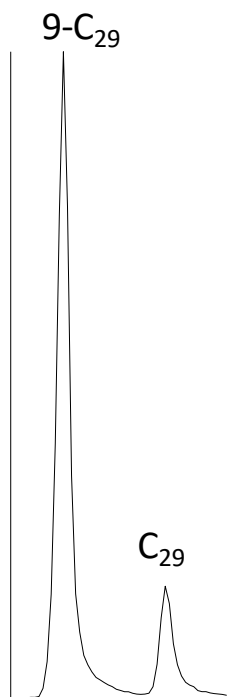

*M. scutellaris*

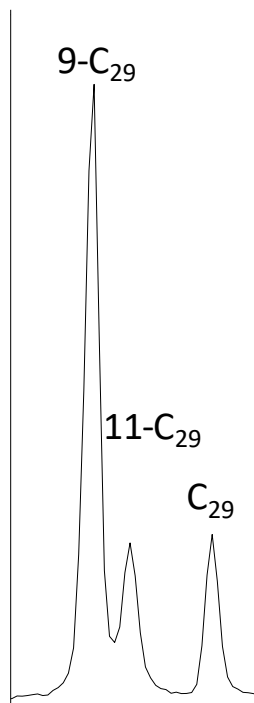

*M. quadrifasciata*

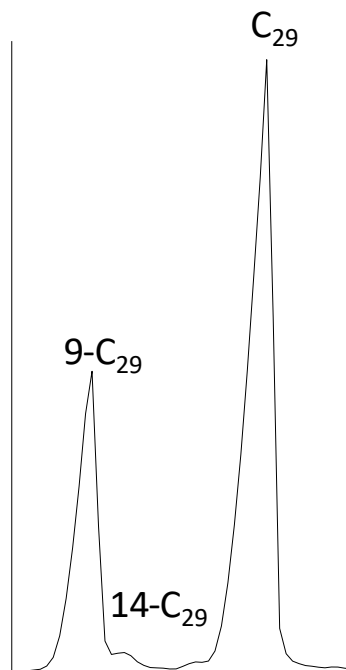

*M. subnitida*

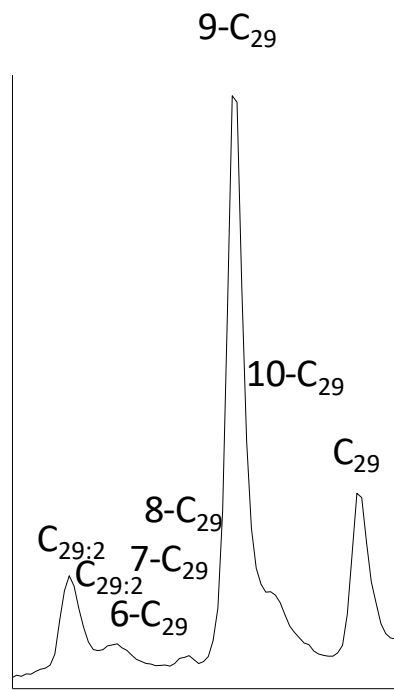

*M. asilvai*

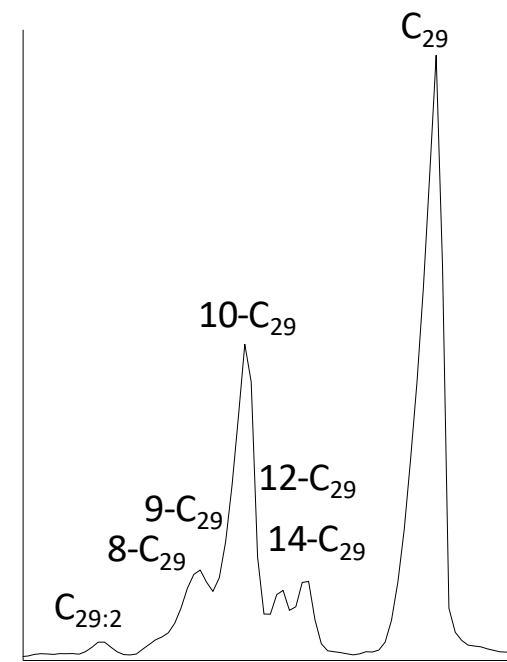

Fig. S7. A section of the TIC's for five species of *Melipona* and the corresponding C<sub>29</sub> alkene isomers revealed by the DMDS reactions.
